# Supplementary material
Source: PubMed Central journal article supplement (PMC7478222)
Supplement: Supp_FigS1.pdf [file Supp_FigS1.pdf]

## Supplementary Data

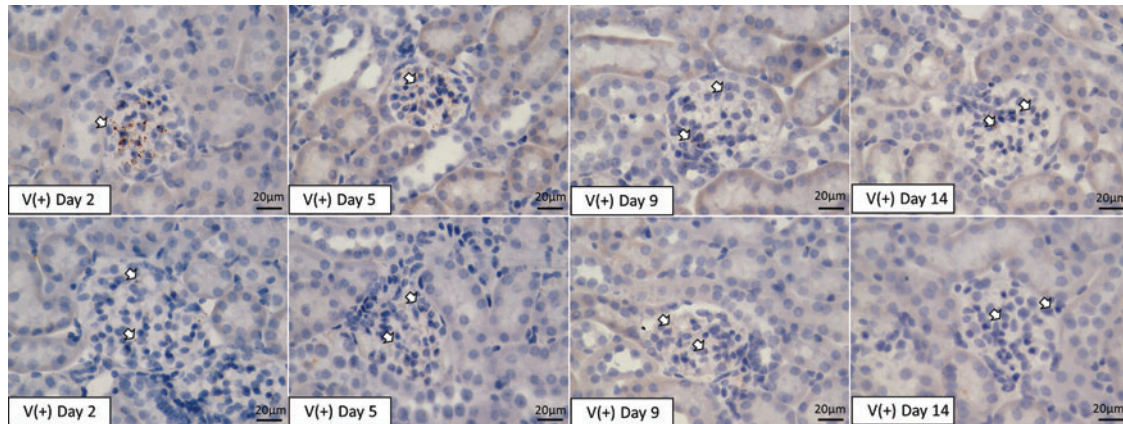

**SUPPLEMENTARY FIG. S1.** CVB4 abundance and variability over time. Representative images from *in situ* hybridization analysis of +ssCVB4 RNA in kidney samples with easily visible (*upper panels*) and hardly visible (*lower panels*) expression 2, 5, 9, and 14 days postinoculation. *Arrowheads* point to labeled CVB4 RNA (images taken at 400× magnification;  $n=4$ ). CVB4, coxsackievirus B4.
