# Supplementary material
Source: PubMed Central journal article supplement (PMC7478222)
Supplement: Supp_FigS3.pdf [file Supp_FigS3.pdf]

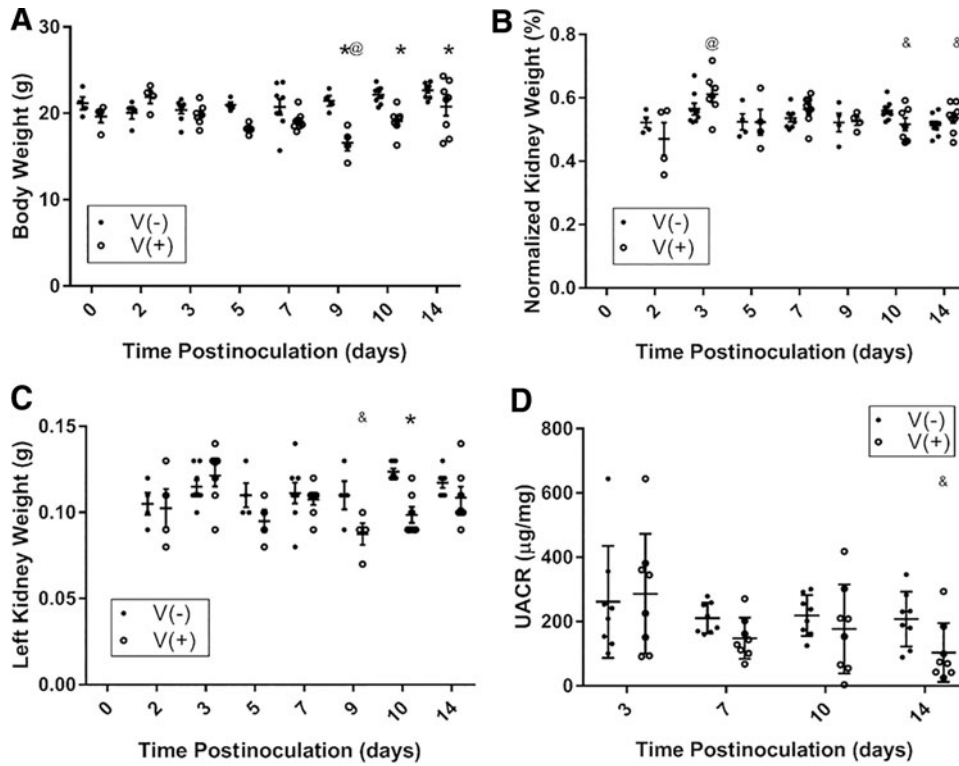

**SUPPLEMENTARY FIG. S3.** CVB4 inoculation acutely effects body and kidney weight and kidney function. (A) Body weight, (B) left kidney weight, and (C) normalized kidney weight were measured 0, 2, 3, 5, 7, 9, 10, and 14 days post-CVB4 inoculation. (D) Box plots of urinary albumin excretion (urine albumin to creatinine ratio) measured 3, 7, 10, and 14 days post-CVB4 inoculation. Percent kidney weight was calculated by dividing left kidney weight by body weight and multiplying by 100 ( $n=4-8$  per group; bars represent significant differences between indicated groups;  $*p<0.05$  compared with age-matched noninoculated controls, @  $p<0.05$  compared with CVB4-inoculated day 2, &  $p<0.05$  compared with CB4-inoculated day 3).
