# Supplementary material
Source: PubMed Central journal article supplement (PMC7478222)
Supplement: Supp_FigS4-S5.pdf [file Supp_FigS4-S5.pdf]

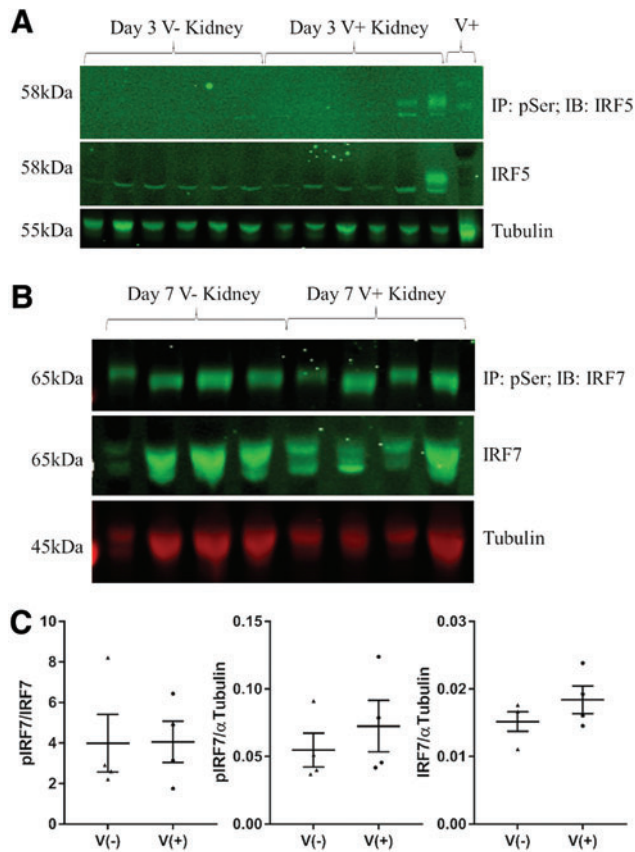

**SUPPLEMENTARY FIG. S4.** IRF activation following CVB4 inoculation. Western blot analyses of 200  $\mu$ g of total protein immunoprecipitated with pSer antibody probed for (A) IRF5 3 days and (B) IRF7 7 days postinoculation. Separately, 20  $\mu$ g of total protein was probed with total IRF5, IRF7, and  $\alpha$ Tubulin antibodies as protein loading controls. V<sup>+</sup> indicates 10  $\mu$ g lysate from CVB4-inoculated NOD pancreas. Densitometry analysis of phospho/total, phospho/loading control, and total/loading control is depicted for (C) IRF7 ( $n=4-6$ ). IP, immunoprecipitated; IRF, interferon regulatory factor.

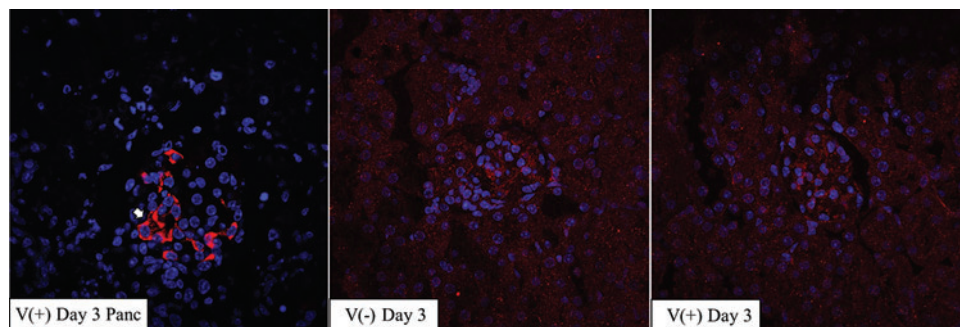

**SUPPLEMENTARY FIG. S5.** TLR3 localization. Representative images of immunofluorescence of CVB4-inoculated pancreas and noninoculated and CVB4-inoculated mouse kidneys 3 days postinoculation. *Arrowhead* points to area with TLR3 protein expression (images taken at 600 $\times$  magnification;  $n=8$ ).
