# Supplementary material
Source: PubMed Central journal article supplement (PMC7478222)
Supplement: Supp_FigS6.pdf [file Supp_FigS6.pdf]

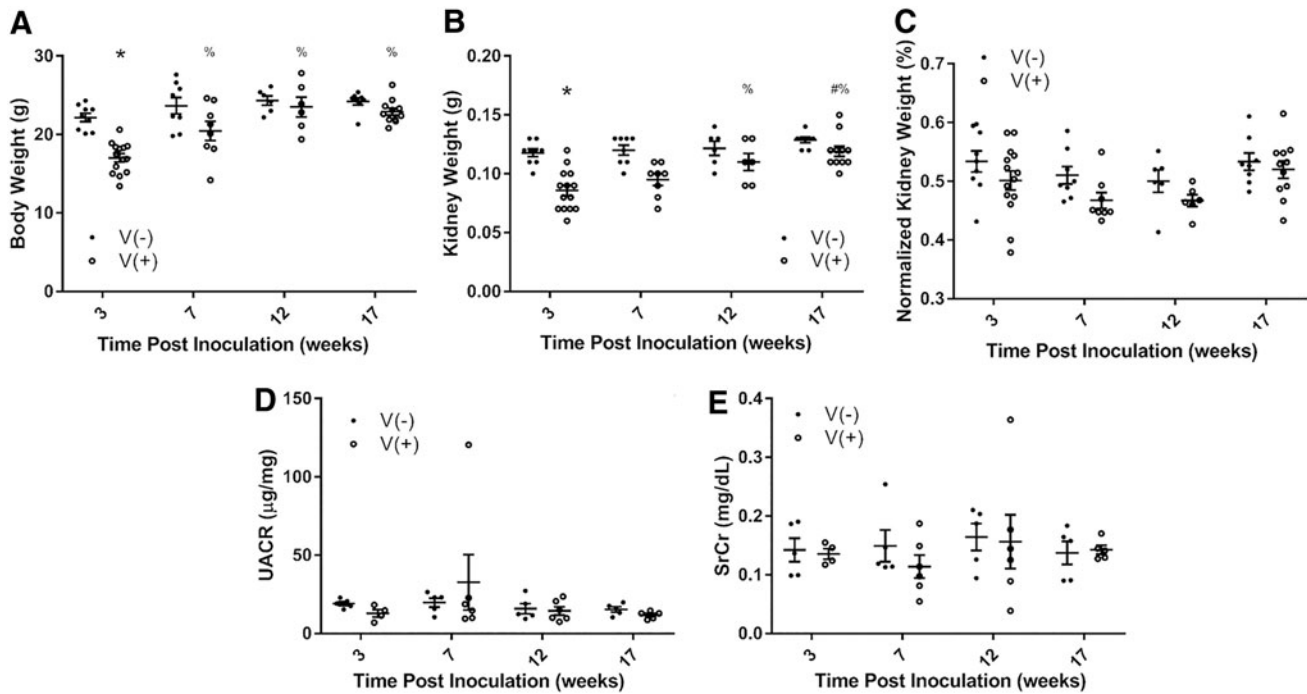

**SUPPLEMENTARY FIG. S6.** Body and kidney weight and kidney function. (A) Body weight, (B) left kidney weight, (C) normalized kidney weight, (D) UACR, and (E) SrCr were measured 3, 7, 12, and 17 weeks post-CVB4 inoculation. Normalized kidney weight was calculated by dividing left kidney weight by whole-mouse body weight and multiplying by 100 ( $n=6-13$ ; \* $p < 0.05$  compared with age-matched noninoculated controls, % $p < 0.05$  compared with CVB4-inoculated week 7, # $p < 0.05$  compared with CVB4-inoculated week 3). SrCr, serum creatinine.
